# Supplementary material for: Use of Selected Lactic Acid Bacteria for the Fermentation of Legume-Based Water Extracts
Source: MDPI journal article supplement (doi:10.3390/foods11213346), 2022-10-25
Supplement: s1 [file s1]

# Use of Selected Lactic Acid Bacteria for the Fermentation of Legume-Based Water Extracts

## Supplementary material

**Table S1.** Concentration of free aminoacids (expressed in mg L<sup>-1</sup>) in lupin grain based beverages at the beginning (T0) and at the end (T28) of refrigerate (4°C) storage period.

| <i>Amino Acid</i> | <i>Unfermented control</i> |        | <i>L. acidophilus</i> ATCC 4356 |        | <i>Lm. fermentum</i> DSM 20052 |       | <i>Lc. paracasei</i> DSM 20312 |        |
|-------------------|----------------------------|--------|---------------------------------|--------|--------------------------------|-------|--------------------------------|--------|
|                   | T0                         | T28    | T0                              | T28    | T0                             | T28   | T0                             | T28    |
| Asp               | 13.01                      | 12.22  | 17.76                           | 14.95  | 1.97                           | 1.66  | 21.43                          | 18.84  |
| Ser               | 69.58                      | 65.44  | 34.59                           | 29.23  | 29.15                          | 22.47 | 32.82                          | 30.16  |
| Glu               | 78.37                      | 74.67  | 95.63                           | 77.07  | 56.93                          | 40.36 | 80.83                          | 69.12  |
| Gly               | 47.77                      | 45.56  | 29.88                           | 24.38  | 26.61                          | 18.75 | 24.96                          | 22.50  |
| Ala               | 26.42                      | 24.69  | 13.55                           | 12.41  | 8.00                           | 6.61  | 11.56                          | 10.62  |
| Cys               | 57.11                      | 53.63  | 10.80                           | 10.36  | 10.96                          | 8.99  | 12.67                          | 13.10  |
| Tyr               | 24.13                      | 23.33  | 11.70                           | 11.82  | 9.68                           | 8.00  | 12.82                          | 11.28  |
| His               | 11.70                      | 10.81  | 13.17                           | 12.02  | 9.40                           | 7.65  | 11.07                          | 9.05   |
| Orn               | 1.46                       | 1.13   | 1.25                            | 0.94   | 76.07                          | 60.37 | 1.37                           | 1.60   |
| Lys               | 23.62                      | 22.26  | 5.20                            | 3.07   | 11.88                          | 8.17  | 3.91                           | 3.21   |
| Arg               | 145.42                     | 136.46 | 143.45                          | 112.69 | 0.00                           | 0.00  | 137.49                         | 113.09 |
| Pro               | 29.86                      | 24.37  | 27.72                           | 22.81  | 25.05                          | 20.49 | 27.39                          | 24.07  |
| Thr               | 17.32                      | 16.36  | 10.64                           | 8.97   | 5.95                           | 4.58  | 6.49                           | 5.74   |
| Met               | 9.71                       | 9.28   | 1.93                            | 1.85   | 0.89                           | 0.00  | 0.00                           | 0.00   |
| Phe               | 20.12                      | 17.30  | 4.26                            | 3.79   | 3.04                           | 2.35  | 5.75                           | 5.00   |
| Trp               | 6.78                       | 5.76   | 6.98                            | 5.59   | 6.66                           | 6.11  | 7.31                           | 6.60   |
| Val               | 23.15                      | 22.11  | 7.53                            | 5.66   | 5.05                           | 4.21  | 1.73                           | 1.51   |
| Ile               | 20.56                      | 20.21  | 3.53                            | 2.77   | 0.69                           | 0.00  | 0.00                           | 0.00   |
| Leu               | 28.77                      | 27.47  | 5.12                            | 4.40   | 2.41                           | 2.38  | 0.39                           | 0.00   |

**Table S2.** Concentration of free aminoacids (expressed in mg L<sup>-1</sup>) in pea grain based beverages at the beginning (T0) and at the end (T28) of refrigerate (4°C) storage period.

| <i>Amino Acid</i> | <i>Unfermented control</i> |        | <i>L. acidophilus</i> ATCC 4356 |        | <i>Lm. fermentum</i> DSM 20052 |        | <i>Lc. paracasei</i> DSM 20312 |        |
|-------------------|----------------------------|--------|---------------------------------|--------|--------------------------------|--------|--------------------------------|--------|
|                   | T0                         | T28    | T0                              | T28    | T0                             | T28    | T0                             | T28    |
| Asp               | 11.18                      | 10.81  | 16.70                           | 14.67  | 7.44                           | 6.23   | 20.12                          | 17.57  |
| Ser               | 55.60                      | 58.19  | 41.48                           | 39.30  | 34.69                          | 31.21  | 48.03                          | 43.07  |
| Glu               | 118.95                     | 113.97 | 118.09                          | 115.80 | 118.89                         | 89.70  | 137.37                         | 110.18 |
| Gly               | 34.82                      | 33.64  | 47.24                           | 38.15  | 66.52                          | 52.45  | 47.78                          | 40.44  |
| Ala               | 127.94                     | 132.63 | 142.28                          | 131.11 | 146.51                         | 126.85 | 143.87                         | 127.12 |
| Cys               | 44.27                      | 44.32  | 0.00                            | 0.00   | 0.00                           | 0.00   | 0.00                           | 0.00   |
| Tyr               | 8.41                       | 8.28   | 6.16                            | 4.12   | 2.52                           | 1.74   | 6.61                           | 2.76   |
| His               | 13.12                      | 12.52  | 13.84                           | 13.85  | 11.83                          | 9.08   | 14.20                          | 13.67  |
| Orn               | 2.31                       | 1.68   | 2.59                            | 2.30   | 149.00                         | 120.04 | 2.59                           | 1.93   |
| Lys               | 43.22                      | 31.30  | 42.33                           | 30.88  | 56.40                          | 45.60  | 44.38                          | 43.40  |
| Arg               | 275.81                     | 295.37 | 289.24                          | 303.17 | 18.59                          | 15.40  | 273.47                         | 274.47 |
| Pro               | 17.55                      | 17.39  | 18.53                           | 16.98  | 17.17                          | 15.22  | 17.92                          | 17.04  |
| Thr               | 81.44                      | 78.92  | 84.37                           | 83.00  | 46.00                          | 36.81  | 84.91                          | 76.44  |
| Met               | 8.53                       | 8.44   | 6.38                            | 6.14   | 5.04                           | 4.075  | 7.13                           | 6.29   |
| Phe               | 16.10                      | 16.49  | 16.10                           | 13.90  | 12.27                          | 9.73   | 18.23                          | 16.28  |
| Trp               | 1.75                       | 1.67   | 1.80                            | 0.00   | 0.94                           | 0.00   | 1.95                           | 0.00   |
| Val               | 47.88                      | 47.82  | 58.75                           | 52.33  | 48.60                          | 40.71  | 58.81                          | 52.36  |
| Ile               | 29.93                      | 30.07  | 30.44                           | 26.34  | 16.70                          | 16.38  | 30.24                          | 26.36  |
| Leu               | 28.39                      | 28.59  | 31.72                           | 23.30  | 26.36                          | 20.20  | 32.09                          | 28.76  |

**Table S3.** Results of sensory analysis of lupin-based beverage before and after fermentation, allocated to macrodescriptors Appearance, Odour and Taste. In the brackets the panelist assigning the same descriptor and score. Binary response score: 0 = not expected and/or unwanted feature; 1 = expected and/or welcome feature

| Unfermented Extract      |                 |                                                                      |       | <i>L. acidophilus</i> ATCC 4356 |                                                                      |                          | <i>Lm. fermentum</i> DSM 20052 |                                                                      |       | <i>Lc. paracasei</i> DSM 20312 |                                                                      |       |  |                          |  |      |  |
|--------------------------|-----------------|----------------------------------------------------------------------|-------|---------------------------------|----------------------------------------------------------------------|--------------------------|--------------------------------|----------------------------------------------------------------------|-------|--------------------------------|----------------------------------------------------------------------|-------|--|--------------------------|--|------|--|
|                          | Descriptor      | Meaning                                                              | Score | Descriptor                      | Meaning                                                              | Score                    | Descriptor                     | Meaning                                                              | Score | Descriptor                     | Meaning                                                              | Score |  |                          |  |      |  |
| Appearance               | Clear (4)       | Not turbid                                                           | 1     | Turbid (4)                      | Not clear                                                            | 0.25                     | Clear (3)                      | Not turbid                                                           | 1     | Clear (3)                      | Not turbid                                                           | 1     |  |                          |  |      |  |
|                          | Sediment (3)    | slight                                                               | 0     |                                 |                                                                      |                          | Sediment (2)                   | Presence of deposit                                                  | 0     | Sediment (2)                   | Presence of deposit                                                  | 0     |  |                          |  |      |  |
|                          | Yellow (3)      | Pale strawyellow                                                     | 1     | Yellow (6)                      | Pale strawyellow                                                     | 0.83                     | Yellow (5)                     | Nuances of pale yellow to almost transparent                         | 0.60  | Yellow (5)                     | Pale strawyellow                                                     | 0.60  |  |                          |  |      |  |
|                          | Average score   |                                                                      | 0.70  | Average score                   |                                                                      | 0.60                     | Average score                  |                                                                      | 0.60  | Average score                  |                                                                      | 0.60  |  |                          |  |      |  |
| Odour                    | Fruity (1)      | melon and/or orange odours                                           | 1     | Butter (1)                      | Butter/diacetyl                                                      | 1                        | Fruity (2)                     | Fresh fruit                                                          | 1     | Ham (3)                        | Cooked ham                                                           | 1     |  |                          |  |      |  |
|                          | Vegetal (4)     | Grass cutting, leaves                                                | 0.75  | Ham (3)                         | Cooked ham                                                           | 1                        | Vegetal (2)                    | Grass cutting, leaves                                                | 0.50  | Acid (2)                       | Odour pungent as vinegar                                             | 0     |  |                          |  |      |  |
|                          | Sweet/flowe (2) | Smell of fresh flowers or candy                                      | 0.5   | Sandalwood (3)                  | Typical smell of sandalwood                                          | 1                        | Ham (3)                        | cookedham                                                            | 0.67  | Fruity (3)                     | melon and/or orange odours                                           | 1     |  |                          |  |      |  |
|                          | Almond (3)      | Almond milk/horchata                                                 | 1     | Acid (3)                        | vinegar                                                              | 0                        | Chemical (3)                   | Smell of pharmacy                                                    | 0     | Vegetal (2)                    | Grass cutting, leaves                                                | 0.50  |  |                          |  |      |  |
|                          | Average score   |                                                                      | 0.80  | Average score                   |                                                                      | 0.70                     | Average score                  |                                                                      | 0.50  | Average score                  |                                                                      | 0.70  |  |                          |  |      |  |
| Taste                    | Bitter (10)     | Unpleasant and persistent bitter sensation in the retrolingual areas | 0     | Bitter (4)                      | Unpleasant and persistent bitter sensation in the retrolingual areas | 0                        | Bitter (4)                     | Unpleasant and persistent bitter sensation in the retrolingual areas | 0     | Bitter (4)                     | Unpleasant and persistent bitter sensation in the retrolingual areas | 0     |  |                          |  |      |  |
|                          |                 |                                                                      |       | Latex (3)                       | milk flavour (mixed with bitterness)                                 | 1                        | Liquid (2)                     | flowing                                                              | 1     | Almond (3)                     | almondmilk/horchata                                                  | 1     |  |                          |  |      |  |
|                          |                 |                                                                      |       | Sweet (3)                       | Slightly sweet                                                       | 1                        | Vegetal (4)                    | Grass cutting, leaves                                                | 0.5   | Vegetal (3)                    | Grass cutting, leaves                                                | 1     |  |                          |  |      |  |
|                          | Average score   |                                                                      | 0.00  | Average score                   |                                                                      | 0.60                     | Average score                  |                                                                      | 0.40  | Average score                  |                                                                      | 0.60  |  |                          |  |      |  |
| Average evaluation score |                 |                                                                      |       | 0.50                            |                                                                      | Average evaluation score |                                | 0.63                                                                 |       | Average evaluation score       |                                                                      | 0.50  |  | Average evaluation score |  | 0.63 |  |

**Table S4.** Results of sensory analysis of pea-based beverage before and after fermentation, allocated to macrodescriptors Appearance, Odour and Taste. In the brackets the panelist assigning the same descriptor and score. Binary response score: 0 = not expected and/or unwanted feature; 1 = expected and/or welcome feature

|                          | Unfermented Extract    |                                     |       | <i>L. acidophilus</i> ATCC 4356 |                                                |                          | <i>Lm. fermentum</i> DSM 20052   |                                          |       | <i>Lc. paracasei</i> DSM 20312 |                                           |                          |               |  |      |      |  |                          |  |  |      |  |  |
|--------------------------|------------------------|-------------------------------------|-------|---------------------------------|------------------------------------------------|--------------------------|----------------------------------|------------------------------------------|-------|--------------------------------|-------------------------------------------|--------------------------|---------------|--|------|------|--|--------------------------|--|--|------|--|--|
|                          | Descriptor             | Meaning                             | Score | Descriptor                      | Meaning                                        | Score                    | Descriptor                       | Meaning                                  | Score | Descriptor                     | Meaning                                   | Score                    |               |  |      |      |  |                          |  |  |      |  |  |
| Appearance               | Sediment (1)           | presence of deposit                 | 0     | Sediment (4)                    | presence of deposit                            | 0.25                     | Sediment (3)                     | presence of deposit                      | 0     | Sediment (3)                   | Visible particles on the bottom of bottle | 0                        |               |  |      |      |  |                          |  |  |      |  |  |
|                          | Yellow (3)             | greenish-yellow                     | 0.70  | Particulate matter (1)          | Debris in the beverage                         | 0                        | Turbid (3)                       | not clear                                | 0.33  |                                |                                           |                          |               |  |      |      |  |                          |  |  |      |  |  |
|                          | Phase separation (1)   | presence of solid and liquid phase  | 0     | Turbid (1)                      | not clear                                      | 1                        | yellow like water melon skin (4) | nuances from pale yellow to greenish     | 0.5   | Clear (3)                      | Not turbid                                | 1                        |               |  |      |      |  |                          |  |  |      |  |  |
|                          | Natural (1)            | remindnatural color                 | 1     | Greenish (4)                    | shades from opaque green to almost transparent | 0.75                     |                                  |                                          |       |                                |                                           |                          |               |  |      |      |  |                          |  |  |      |  |  |
|                          | Turbid (3)             | not clear                           | 0     |                                 |                                                |                          |                                  |                                          |       |                                |                                           |                          |               |  |      |      |  |                          |  |  |      |  |  |
|                          | Brilliant (1)          | bright color                        | 1     |                                 |                                                |                          |                                  |                                          |       | Yellow (4)                     | nuances from pale yellow to greenish      | 0.50                     |               |  |      |      |  |                          |  |  |      |  |  |
|                          | Average score          |                                     |       | 0.40                            |                                                |                          | Average score                    |                                          |       | 0.30                           |                                           |                          | Average score |  |      | 0.50 |  |                          |  |  |      |  |  |
| Odour                    | Sweet (1)              | Slightly sweet                      | 1     | Vegetal (1)                     | grass cutting, leaves                          | 1                        | Sour milk (2)                    | Fermented milk                           | 0.5   | Fragrant (1)                   | Sweet like honey or syrup                 | 1                        |               |  |      |      |  |                          |  |  |      |  |  |
|                          | Peas (5)               | Fresh peas                          | 0.60  | Fruity (1)                      | Fresh fruit                                    | 1                        | Peas (4)                         | dry peas                                 | 0.5   | Fruity (2)                     | Fresh fruit                               | 1                        |               |  |      |      |  |                          |  |  |      |  |  |
|                          | Vegetal (4)            | Smell of hay                        | 1     | Iron (1)                        | Metallic                                       | 0                        | Vegetal (1)                      | grass cutting, leaves                    | 0     | Vegetal (1)                    | grass cutting, leaves                     | 1                        |               |  |      |      |  |                          |  |  |      |  |  |
|                          |                        |                                     |       | Peas (1)                        | Freshpeas                                      | 1                        | Not fresh (1)                    | stale                                    | 0     | Peas (1)                       | Fresh peas                                | 1                        |               |  |      |      |  |                          |  |  |      |  |  |
|                          |                        |                                     |       | Acid (4)                        | Vinegar                                        | 0.75                     | Similiar to orange (1)           | Citrus fruit                             | 1     | Floral (1)                     | Fresh flowers                             | 1                        |               |  |      |      |  |                          |  |  |      |  |  |
|                          |                        |                                     |       | Sandal wood (1)                 | Typical smell of sandalwood                    | 1                        | Iron (1)                         | metallic                                 | 0     | Slightly fermented/acid (4)    | weak notes of lactic fermentation         | 0.75                     |               |  |      |      |  |                          |  |  |      |  |  |
|                          | Fermented (1)          | Lactic acid fermentation            | 1     |                                 |                                                |                          |                                  |                                          |       |                                |                                           |                          |               |  |      |      |  |                          |  |  |      |  |  |
|                          | Average score          |                                     |       | 0.80                            |                                                |                          | Average score                    |                                          |       | 0.40                           |                                           |                          | Average score |  |      | 0.90 |  |                          |  |  |      |  |  |
| Taste                    | Light taste/watery (2) | Taste inconsistent similar to water | 0,5   | Light taste/watery (2)          | Taste inconsistent similar to water            | 0.5                      | Acid (2)                         | Taste resembling diluted wine or vinegar | 0.50  | Light taste/watery (3)         | Taste inconsistent similar to water       | 0,67                     |               |  |      |      |  |                          |  |  |      |  |  |
|                          | Sweet (1)              | Sugar                               | 1     | Natural (1)                     | taste resembling peas                          | 1                        | Natural (1)                      | taste resembling peas                    | 1     | Natural (1)                    | taste resembling peas                     | 1                        |               |  |      |      |  |                          |  |  |      |  |  |
|                          | Vegetal (1)            | Grass cutting, leaves               | 1     | Vegetal (1)                     | Grass cutting, leaves                          | 1                        | Fluid like water (1)             | Ease to swallow                          | 1     | Sweet (1)                      | Sugar                                     | 1                        |               |  |      |      |  |                          |  |  |      |  |  |
|                          | Natural (1)            | Taste resembling peas               | 1     | Acid (2)                        | Diluted vinegar                                | 0.5                      | Yeast (1)                        | Bitter after taste                       | 0     | Fluid like water (1)           | Ease to swallow                           | 1                        |               |  |      |      |  |                          |  |  |      |  |  |
|                          | Sandy (1)              | Sand on the palate                  | 0     | Sandy (2)                       | Sand on the palate                             | 0.5                      | Not sandy (1)                    | absence of sand on the palate            | 1     | Acid (2)                       | Taste resembling diluted wine or vinegar  | 1                        |               |  |      |      |  |                          |  |  |      |  |  |
|                          | Fluid/watery (3)       | Ease to swallow                     | 0,3   | Citrus fruit (1)                | Acid like diluted lemon juice                  | 1                        | Citrus fruit (1)                 | Acid like diluted lemon juice            | 1     | Vegetal (1)                    | Grass cutting, leaves                     | 1                        |               |  |      |      |  |                          |  |  |      |  |  |
|                          | Not acid (1)           | Absence of acid or vinegar tastes   | 1     | Iron (1)                        | Metallic                                       | 0                        | Vegetal (1)                      | grass cutting, leaves                    | 1     | Fruity (1)                     | Taste as fresh fruit                      | 1                        |               |  |      |      |  |                          |  |  |      |  |  |
|                          |                        |                                     |       | Fluid/watery (1)                | Ease to swallow                                | 1                        | Iron (1)                         | metallic                                 | 0     |                                |                                           |                          |               |  |      |      |  |                          |  |  |      |  |  |
|                          |                        |                                     |       |                                 |                                                |                          | Fermented (1)                    | Lactic acid fermentation                 | 1     |                                |                                           |                          |               |  |      |      |  |                          |  |  |      |  |  |
| Average score            |                        |                                     | 0.70  |                                 |                                                | Average score            |                                  |                                          | 0.70  |                                |                                           | Average score            |               |  | 0.90 |      |  |                          |  |  |      |  |  |
| Average evaluation score |                        |                                     | 0.63  |                                 |                                                | Average evaluation score |                                  |                                          | 0.67  |                                |                                           | Average evaluation score |               |  | 0.47 |      |  | Average evaluation score |  |  | 0.77 |  |  |
